# Supplementary material for: AutoFocus: a hierarchical framework to explore multi-omic disease associations spanning multiple scales of biomolecular interaction
Source: PubMed Central journal article supplement — Commun Biol. 2024 Sep 6;7:1094. doi: 10.1038/s42003-024-06724-2 (PMC11377741; doi:10.1038/s42003-024-06724-2), 2024-09-06
Supplement: 42003_2024_6724_MOESM3_ESM.pdf [file 42003_2024_6724_MOESM3_ESM.pdf]

## **Description of Additional Supplementary Files**

File name: Supplementary Data 1

Description: Annotations and cluster membership of the AutoFocus method applied to the QMDiab dataset.

File name: Supplementary Data 2

Description: Annotations and cluster membership of the AutoFocus method applied to the ROS/MAP dataset.
